# Supplementary material for: The combined application of antibiotic-loaded bone cement and vacuum sealing drainage for sternal reconstruction in the treatment of deep sternal wound infection
Source: Research Square preprint supplement (doi:10.21203/rs.3.rs-1326353/v1), 2022-06-14
Supplement: Supplementary file 1 [file a97f6ff8b5aa2ec7a3b8a047.docx]

**Table 2** The result of blood/local concentration of vancomycin test (Mean±SD，ug/ml, n = 9)

| Characteristics **BC** **LC** |
| --- |
| D1 3.1±0.8 293±93  D3 3.0±1.2 312±73  D5 2.5±1.3 235±61  D7 2.8±0.3 162±36  D9 <2.0 -  D11 <2.0 -  D14 <2.0 - |

SD, standard deviation; BC:blood concentration; LC:local concentration.
